# Supplementary material for: SEPT14 Mutations and Teratozoospermia: Genetic Effects on Sperm Head Morphology and DNA Integrity
Source: PubMed Central journal article supplement (PMC6780492; doi:10.3390/jcm8091297), 2019-08-23
Supplement: jcm-08-01297-s001.pdf [file jcm-08-01297-s001.pdf]

**Table S1.** Sequences of primers used in this study for *SEPTIN14* novel variants.

| Exon |         | Primer                 | Product size (bp) | Annealing temperature (°C) |
|------|---------|------------------------|-------------------|----------------------------|
| 2    | Forward | AAACAGATGAATAGTGTGAAC  | 423               | 56                         |
|      | Reverse | CTAACAAGGTCATCGGAC     |                   |                            |
| 3    | Forward | GCATCTTGCTGAGGTATG     | 431               | 58                         |
|      | Reverse | CAAAGTGAGAACCTGTCT     |                   |                            |
| 4    | Forward | GACCAACTACTCCACCTTTCC  | 789               | 59                         |
|      | Reverse | GCCTGGGTGATGGAATGAAA   |                   |                            |
| 5    | Forward | GCACCCAGCTTTCCTCTATG   | 763               | 58                         |
|      | Reverse | GCAAGACCCTGCCTCAAATA   |                   |                            |
| 6    | Forward | CAGGAGAGTGGCGTGAAC     | 587               | 56                         |
|      | Reverse | GGTAACACCTTCAGAGTCATTT |                   |                            |
| 7    | Forward | TGCAGGGTAGATCCCTGTCTA  | 743               | 58                         |
|      | Reverse | GCAGCGTTCAGCAAACCTTCT  |                   |                            |
| 8    | Forward | TTGTTCAAGTTGTGTGTTATT  | 403               | 56                         |
|      | Reverse | TTATGATGGCTCAAGATGG    |                   |                            |
| 9    | Forward | GTCTTACTCTGTCTCCCA     | 413               | 58                         |
|      | Reverse | AAGGCTATATTCAAGTCTACA  |                   |                            |
| 10   | Forward | TATCTCAGTGTCTTACTCCTG  | 407               | 54                         |
|      | Reverse | ATGCTACAAAGACAATCTCA   |                   |                            |

**Table S2.** Variants identified in infertile men in the coding region of *SEPTIN14*.

| variants    | Genotype | Genotype frequency |                 | rs No./ Functional Consequence |
|-------------|----------|--------------------|-----------------|--------------------------------|
|             |          | Case (n=254)       | Control (n=116) |                                |
| c.116G>A    | GG       | 251 ( 98.8 % )     | 112 ( 96.6 % )  |                                |
| p.Pro39His  | GA       | 3 ( 1.2 % )        | 4 ( 3.4 % )     |                                |
|             | AA       | 0 ( 0.0 % )        | 0 ( 0.0 % )     |                                |
| c.367G>A    | GG       | 251 ( 98.8 % )     | 116 ( 100.0 % ) |                                |
| p.Ala123Thr | GA       | 3 ( 1.2 % )        | 0 ( 0.0 % )     |                                |
|             | AA       | 0 ( 0.0 % )        | 0 ( 0.0 % )     |                                |
| c.459C>T    | CC       | 254 ( 100.0 % )    | 114 ( 98.3 % )  | rs202157028                    |
| p.Tyr153=   | CT       | 0 ( 0.0 % )        | 2 ( 1.7 % )     | synonymous codon               |
|             | TT       | 0 ( 0.0 % )        | 0 ( 0.0 % )     |                                |
| c.543G>A    | GG       | 253 ( 99.6 % )     | 116 ( 100.0 % ) |                                |
| p.Lys181=   | GA       | 1 ( 0.4 % )        | 0 ( 0.0 % )     |                                |
|             | AA       | 0 ( 0.0 % )        | 0 ( 0.0 % )     |                                |
| c.617C>T    | CC       | 254 ( 100.0 % )    | 115 ( 99.1 % )  | rs761205837                    |
| p.Thr206Met | CT       | 0 ( 0.0 % )        | 1 ( 0.9 % )     | missense                       |
|             | TT       | 0 ( 0.0 % )        | 0 ( 0.0 % )     |                                |
| c.998T>C    | TT       | 251 ( 98.8 % )     | 116 ( 100.0 % ) | rs185254020                    |
| p.Ile333Thr | TC       | 3 ( 1.2 % )        | 0 ( 0.0 % )     | missense                       |
|             | CC       | 0 ( 0.0 % )        | 0 ( 0.0 % )     |                                |

**Table S3.** Variants identified in infertile men in the noncoding regions of the *SEPTIN14* gene.

| variants     | Genotype | Genotype frequency |                 | rs No./ Functional Consequence |
|--------------|----------|--------------------|-----------------|--------------------------------|
|              |          | Case (n=254)       | Control (n=116) |                                |
| c.-15-42T>C  | TT       | 249 ( 98.0 % )     | 113 ( 97.4 % )  | rs1212548424                   |
|              | TC       | 5 ( 2.0 % )        | 3 ( 2.6 % )     | intron variant                 |
|              | CC       | 0 ( 0.0 % )        | 0 ( 0.0 % )     |                                |
| c.54+97A>T   | AA       | 75 ( 29.5 % )      | 39 ( 33.6 % )   | rs10499759                     |
|              | AT       | 127 ( 50.0 % )     | 58 ( 50.0 % )   | intron variant                 |
|              | TT       | 52 ( 20.5 % )      | 19 ( 16.4 % )   |                                |
| c.176-41C>A  | CC       | 253 ( 99.6 % )     | 116 ( 100.0 % ) |                                |
|              | CA       | 1 ( 0.4 % )        | 0 ( 0.0 % )     |                                |
|              | AA       | 0 ( 0.0 % )        | 0 ( 0.0 % )     |                                |
| c.559-120C>T | CC       | 249 ( 98.0 % )     | 115 ( 99.1 % )  | rs185656898                    |
|              | CT       | 5 ( 2.0 % )        | 1 ( 0.9 % )     | intron variant                 |
|              | TT       | 0 ( 0.0 % )        | 0 ( 0.0 % )     |                                |
| c.721-291C>T | CC       | 192 ( 75.6 % )     | 89 ( 76.7 % )   | rs138074720                    |
|              | CT       | 56 ( 22.0 % )      | 25 ( 21.6 % )   | intron variant                 |
|              | TT       | 6 ( 2.4 % )        | 2 ( 1.7 % )     |                                |
| c.721-222G>A | GG       | 104 ( 40.9 % )     | 53 ( 45.7 % )   | rs11767417                     |
|              | GA       | 112 ( 44.1 % )     | 46 ( 39.7 % )   | intron variant                 |
|              | AA       | 38 ( 15.0 % )      | 17 ( 14.7 % )   |                                |
| c.817+26G>T  | GG       | 192 ( 75.6 % )     | 84 ( 72.4 % )   | rs73701152                     |
|              | GT       | 52 ( 20.5 % )      | 26 ( 22.4 % )   | intron variant                 |
|              | TT       | 10 ( 3.9 % )       | 6 ( 5.2 % )     |                                |
| c.721-314G>A | GG       | 254 ( 100.0 % )    | 115 ( 99.1 % )  | rs1363256558                   |
|              | GA       | 0 ( 0.0 % )        | 1 ( 0.9 % )     | intron variant                 |
|              | AA       | 0 ( 0.0 % )        | 0 ( 0.0 % )     |                                |
| c.721-234G>A | GG       | 253 ( 99.6 % )     | 116 ( 100.0 % ) | rs373047198                    |
|              | GA       | 1 ( 0.4 % )        | 0 ( 0.0 % )     | intron variant                 |
|              | AA       | 0 ( 0.0 % )        | 0 ( 0.0 % )     |                                |
| c.986+57A>C  | AA       | 247 ( 97.2 % )     | 112 ( 96.6 % )  | rs78233970                     |
|              | AC       | 7 ( 2.8 % )        | 4 ( 3.4 % )     | intron variant                 |
|              | CC       | 0 ( 0.0 % )        | 0 ( 0.0 % )     |                                |
| c.987-32T>A  | TT       | 253 ( 99.6 % )     | 116 ( 100.0 % ) |                                |
|              | TA       | 1 ( 0.4 % )        | 0 ( 0.0 % )     |                                |
|              | AA       | 0 ( 0.0 % )        | 0 ( 0.0 % )     |                                |
